# Supplementary material for: Establishment of Polydopamine-Modified HK-2 Cell Membrane Chromatography and Screening of Active Components from Plantago asiatica L.
Source: MDPI journal article supplement (doi:10.3390/ijms25021153), 2024-01-18
Supplement: s1 [file s1]

**Establishment of Polydopamine-modified HK-2 cell membrane chromatography and screening of active components from *Plantago asiatica* L.**

Hongxue Gao <sup>a,b</sup>, Zhiqiang Liu <sup>a,b</sup>, Fengrui Song <sup>a</sup>, Junpeng Xing <sup>a</sup>, Zhong Zheng <sup>a</sup>, Zong Hou <sup>a,\*</sup>, Shu Liu <sup>a,b,\*</sup>

<sup>a</sup> State Key Laboratory of Electroanalytical Chemistry & Jilin Provincial Key Laboratory of Chinese Medicine Chemistry, Changchun Institute of Applied Chemistry, Chinese Academy of Sciences, Changchun, 130022, China

<sup>b</sup> Institute of Applied Chemistry and Engineering, University of Science and Technology of China, Hefei, 230029, China

\*Corresponding authors:

Shu Liu and Zong Hou

Changchun Institute of Applied Chemistry, Chinese Academy of Sciences, 5625 Renmin Street, Changchun 130022, Jilin, China. Tel.: +86-431-85262613; Fax: +86-431-85262886; E-mail address: liushu@ciac.ac.cn (Shu Liu); houzong@ciac.ac.cn (Zong Hou)

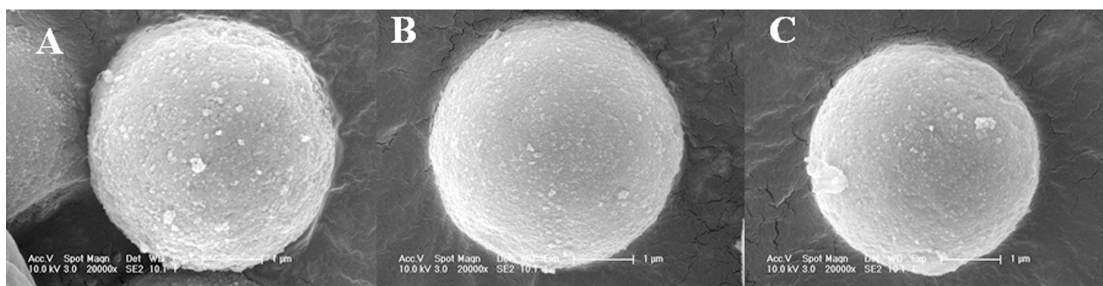

**Figure S1** The SEM image. (A) silica gel, (B) silica gel after vacuum stirring, and (C) silica gel after suction filtration.

**Table S1** The diameter of silica gel treated with different methods

| sample                              | Average diameter (μm) | RSD (%) |
|-------------------------------------|-----------------------|---------|
| silica gel                          | 4.18                  | 0.78    |
| silica gel after vacuum stirring    | 3.98                  | 0.93    |
| silica gel after suction filtration | 3.64                  | 2.11    |

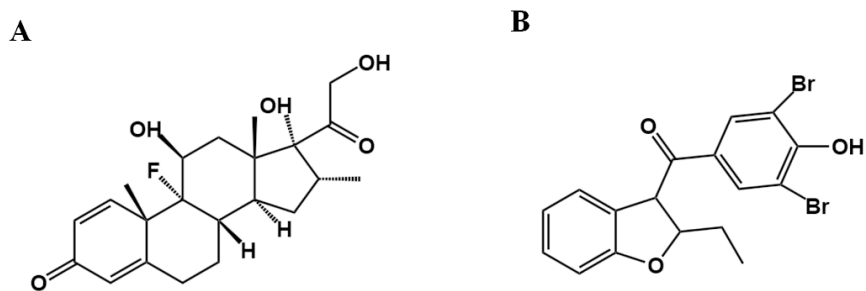

**Figure S2** The chemical structure of (A) dexamethasone and (B) benzbromarone.

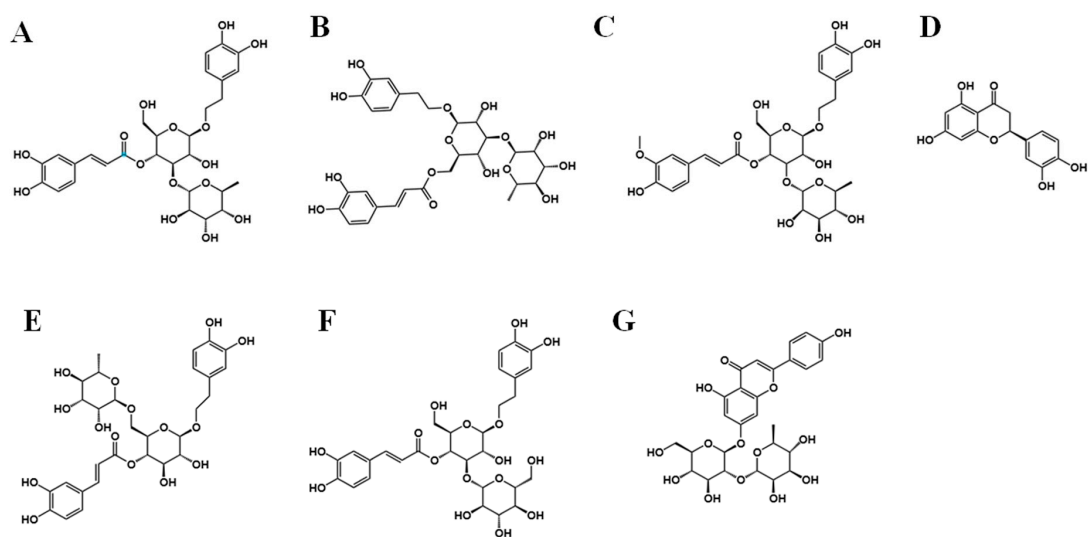

**Figure S3** The chemical structure of seven potential gout treatment components selected from *Plantago asiatica* L. (A) acteoside, (B) isoacteoside, (C) leucoseptoside A, (D) eriodictyol, (E) forsythiaside A, (F) plantamajoside, (G) rhoifolin.

**Table S2.** The precursor ions, product ions, and voltage parameters

| Analytes      | Precursor<br><i>m/z</i> | Product<br><i>m/z</i> | Q1(V) | Q3(V) |
|---------------|-------------------------|-----------------------|-------|-------|
| Uric acid     | 167.10                  | 124.15                | 19    | 12    |
| Hippuric acid | 178.15                  | 134.20                | 17    | 12    |

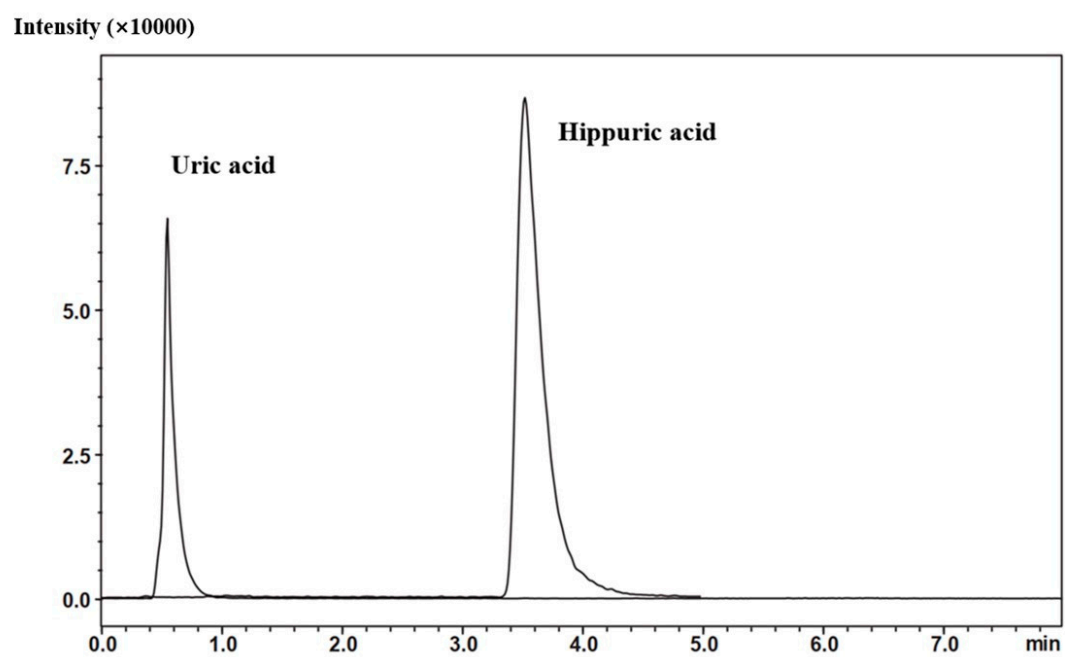

**Figure S4.** Base peak intensity chromatograms of uric acid and hippuric acid
